# Supplementary material
Source: Springer Nature journal article supplement (https://www.springermedizin.de/resource/supplementary/12950_2012_344_MOESM5_ESM.pdf/9557514)

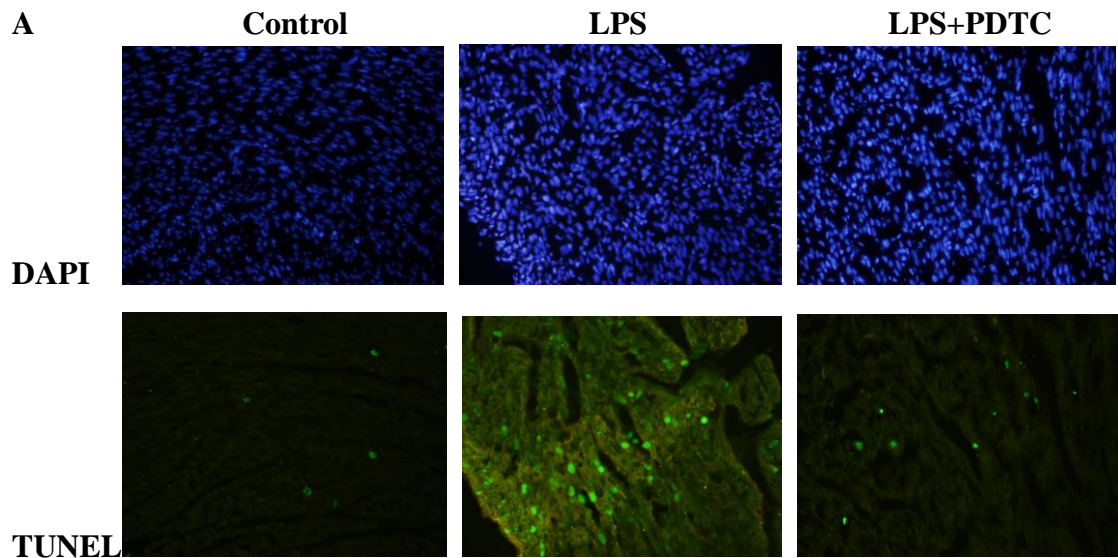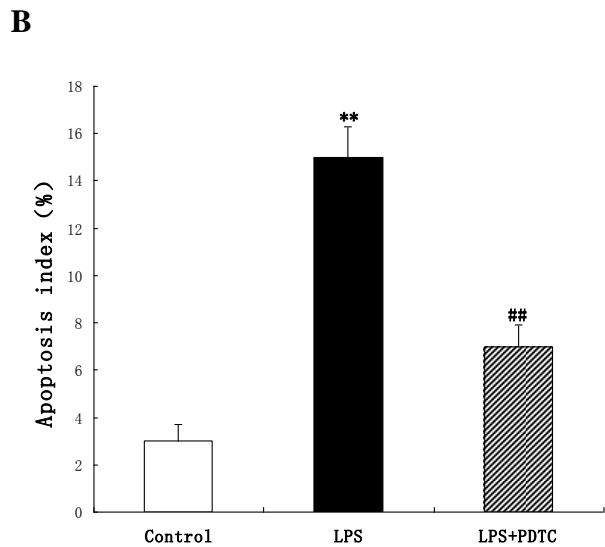

Supplement: MOESM5 [file 9557514]
